## INHIBITION OF VOLTAGE-DEPENDENT $\text{Ca}^{2+}$ INFLUX BY EXTRACELLULAR ATP IN SALIVARY CELLS OF THE LEECH *HAEMENTERIA GHILIANII*

WERNER A. WUTTKE, THOMAS MUNSCHE AND JOACHIM W. DEITMER\*

Abteilung für Allgemeine Zoologie, Fachbereich Biologie, Universität Kaiserslautern, Postfach 3049, D-67653 Kaiserslautern, Germany

Accepted 23 February 1996

### Summary

The effects of extracellular ATP on intracellular free  $\text{Ca}^{2+}$  concentration ( $[\text{Ca}^{2+}]_i$ ) and depolarization-induced elevations of  $[\text{Ca}^{2+}]_i$  were investigated in salivary cells of the leech *Haementeria ghilianii* using the fluorescent  $\text{Ca}^{2+}$  indicator Fura-2. Simultaneously, the membrane potential was monitored or controlled by voltage-clamp. The cell membrane was depolarized either by transient elevations of the extracellular  $\text{K}^+$  concentration ( $[\text{K}^+]_o$ ) to  $90 \text{ mmol l}^{-1}$  or by depolarizing steps under voltage-clamp. The resulting transient elevations of  $[\text{Ca}^{2+}]_i$  ( $\text{Ca}^{2+}$  transients) could be repeatedly elicited with little variability in amplitude.  $\text{Ca}^{2+}$  transients were completely inhibited by  $2 \text{ mmol l}^{-1} \text{ Ni}^{2+}$  or in  $\text{Ca}^{2+}$ -free saline. The transients are, therefore, dependent on  $\text{Ca}^{2+}$  influx from the external medium through voltage-gated  $\text{Ca}^{2+}$  channels. The  $\text{Ca}^{2+}$  influx was rapidly and reversibly inhibited by extracellular application of ATP. The effect was dose-dependent with a threshold concentration below  $10^{-7} \text{ mol l}^{-1}$ . A 50 %

reduction in the amplitude of  $\text{Ca}^{2+}$  transients was obtained by application of  $1\text{--}2 \mu\text{mol l}^{-1}$  ATP or ATP- $\gamma$ -S (apparent  $\text{IC}_{50}$ ,  $1.6 \mu\text{mol l}^{-1}$  ATP) and  $\text{Ca}^{2+}$  transients were almost completely inhibited by  $30\text{--}100 \mu\text{mol l}^{-1}$  ATP. Resting  $[\text{Ca}^{2+}]_i$ , the resting membrane potential and membrane potential changes induced by  $90 \text{ mmol l}^{-1} [\text{K}^+]_o$  were not affected by ATP. Adenosine ( $10 \mu\text{mol l}^{-1}$ ) did not affect resting  $[\text{Ca}^{2+}]_i$ , the resting membrane potential or membrane potential changes induced by  $90 \text{ mmol l}^{-1} [\text{K}^+]_o$  and had little effect on  $\text{Ca}^{2+}$  transients. Suramin, an antagonist of vertebrate  $\text{P}_2$  receptors, was without effect on the inhibitory actions of ATP. We conclude that activation of a suramin-insensitive purinoceptor by ATP inhibits  $\text{Ca}^{2+}$  influx through voltage-gated  $\text{Ca}^{2+}$  channels in the salivary cells of *Haementeria ghilianii*.

Key words: intracellular  $\text{Ca}^{2+}$ , ATP, purinoceptor, salivary cell, leech, *Haementeria ghilianii*.

### Introduction

Extracellular ATP influences cell functions in a variety of vertebrate preparations (Gordon, 1986). Its biological actions are mediated by purinergic  $\text{P}_2$  receptors, and different classes of ATP receptors have been identified by their selectivity for ATP analogues (Burnstock, 1990). At least three different signal transduction pathways are correlated with  $\text{P}_2$  receptors (Dubyak, 1991): (1) activation of modulatory G-proteins; (2) activation of ligand-gated cation channels; and (3) formation of non-selective pores permeable to ions and small metabolites.

Little is known about the physiological role of extracellular ATP in invertebrates, but recent evidence suggests that they possess receptors similar to the vertebrate  $\text{P}_2$  type (Wuttke and Berry, 1993; Backus *et al.* 1994). For example, ATP modulates the electrical properties of the salivary cells of the giant Amazon leech *Haementeria ghilianii*. These cells are extremely large (up to 1.2 mm in diameter) and do not show electrical or

dye-coupling (Sawyer *et al.* 1982; Marshall and Lent, 1984). They produce overshooting action potentials that are  $\text{Ca}^{2+}$ -dependent with no apparent contribution by  $\text{Na}^+$  (Marshall and Lent, 1984; Wuttke and Berry, 1988). The cells possess at least two types of voltage-activated  $\text{Ca}^{2+}$  channels that have been classified according to their voltage range of activation as low-voltage-activated (LVA) and high-voltage-activated (HVA). The HVA conductance is selectively modulated by micromolar concentrations of external ATP which reduce action potential duration and, in voltage-clamp experiments, decrease peak inward current and increase the rate of current inactivation (Wuttke and Berry, 1993). These results suggested the presence of a receptor similar to the vertebrate  $\text{P}_2$  type.

In the present study, we further characterize the receptor by studying the effects of extracellular ATP on  $[\text{Ca}^{2+}]_i$  of salivary cells of *Haementeria ghilianii*, using the  $\text{Ca}^{2+}$  indicator Fura-2 in combination with membrane potential measurements or

\*Author for correspondence.

voltage-clamp. We demonstrate that micromolar concentrations of external ATP, but not adenosine, reversibly and in a dose-dependent manner inhibit the influx of  $\text{Ca}^{2+}$  through voltage-activated  $\text{Ca}^{2+}$  channels in the salivary cells without affecting resting  $[\text{Ca}^{2+}]_i$  or membrane potential.

## Materials and methods

### Preparation

Experiments were performed on isolated anterior salivary glands of the giant Amazon leech *Haementeria ghilianii* (de Filippi) obtained from our breeding colony. The glands were pinned to the Sylgard base of a Perspex experimental bath and immersed in a continuous flow of physiological saline containing (in  $\text{mmol l}^{-1}$ ): NaCl, 115; KCl, 4;  $\text{CaCl}_2$ , 2;  $\text{MgCl}_2$ , 1; glucose, 11; Hepes, 10 (pH 7.4) at room temperature (20–25 °C). Saline with a  $\text{K}^+$  concentration of  $90 \text{ mmol l}^{-1}$  was made by equimolar substitution of NaCl with KCl. The following substances (Sigma) were added to the saline at known concentrations: adenosine, adenosine 5'-triphosphate (ATP), ATP- $\gamma$ -S and  $\text{NiCl}_2$ . Suramin was kindly provided by Bayer AG (Leverkusen, Germany).

### Electrophysiology

Microelectrodes for the injection of Fura-2 and for applying current were bevelled, mounted on high-speed steppers (SPI, Oppenheim, Germany) and connected to an Axoclamp 2A amplifier (Axon Instruments, USA). Membrane potential and applied current were displayed on an oscilloscope and recorded by a computer and a chart recorder.

### Measurement of intracellular $[\text{Ca}^{2+}]_i$ with Fura-2

Fura-2 was used to determine changes in the intracellular free  $\text{Ca}^{2+}$  concentration of single salivary cells. Large cells with a diameter of up to  $1200 \mu\text{m}$  were usually chosen (see Sawyer *et al.* 1982; Walz *et al.* 1988, for details of the anatomy and ultrastructure of the preparation). The experimental bath was mounted on the stage of an upright microscope (Axioskop, Zeiss) and microelectrodes were positioned using low magnification ( $10\times$  objective). Individual cells were impaled under visual control with a microelectrode containing  $10 \text{ mmol l}^{-1}$  Fura-2 dissolved in  $100 \text{ mmol l}^{-1}$  KCl. For voltage-clamp experiments, cells were impaled with a second microelectrode containing  $3 \text{ mol l}^{-1}$  KCl. A steady hyperpolarizing current of 10–20 nA was passed for 10–30 min through the Fura-2-containing electrode to inject the dye into the cell. The intracellular Fura-2 was excited alternately with monochromatic light at 350 nm and 380 nm (band width 4–8 nm) from a Deltascan dual-wavelength spectrofluorimeter (PTI, Wedel, Germany) using a 75 W xenon arc lamp. The light was directed onto the preparation through a water immersion  $40\times$  objective (Achromplan 40\*/w, Zeiss). Fluorescence intensity was measured at 510 nm using a photon-counting photomultiplier tube. Measurements were limited by a diaphragm to a rectangular field of view from a central region of the cell soma. The microelectrodes were outside this field

to exclude fluorescence light from the electrode containing the Fura-2. Shutters, monochromators and data acquisition were controlled by computer software and by interfaces from PTI. The fluorescence light signals were not calibrated, and results are expressed as the ratio of the fluorescence light upon excitation at 350 and 380 nm ( $F_{350}/F_{380}$ ).

Results are presented as mean values  $\pm$  S.D.

## Results

On termination of the injection of Fura-2 into a cell, the fluorescence measured at 350 nm was stable or increased slightly during the first 2–5 min. In the majority of cells, however, it decreased exponentially with a half-time of 6–12 min before stabilizing at a steady-state level ( $54 \pm 19\%$  of the initial maximum fluorescence,  $N=17$ ). This suggests diffusion of Fura-2 out of the field of view within the large cell. To avoid recording  $\text{Ca}^{2+}$  measurements during the initial period of relatively fast fluorescence decrease, experiments were begun when the fluorescence had stabilized about 10 min after dye injection.

In contrast to the absolute fluorescence, the ratio of the fluorescent light ( $F_{350}/F_{380}$ ) emitted from a resting cell was stable from the beginning of the fluorescence measurements throughout an experiment (i.e.  $>2\text{h}$ ) with a typical value of about 0.4 ( $0.42 \pm 0.05$ ,  $N=27$ ; see Figs 2–5). No fluorescence could be detected in neighbouring cells, confirming earlier studies that have demonstrated a lack of both dye- and electrical coupling between the salivary cells (Sawyer *et al.* 1982; Marshall and Lent, 1984). The resting membrane potential, measured a few minutes after dye injection, was between  $-35$  and  $-60 \text{ mV}$  ( $-43 \pm 10 \text{ mV}$ ,  $N=9$ ), and no spontaneous changes in membrane potential or  $[\text{Ca}^{2+}]_i$  were observed.

### Depolarization-induced transient elevations of $[\text{Ca}^{2+}]_i$

It has been shown previously that an increase in  $[\text{K}^+]_o$  to  $90 \text{ mmol l}^{-1}$  elicits a transient elevation of  $[\text{Ca}^{2+}]_i$  ( $\text{Ca}^{2+}$  transient) in salivary cells of *Haementeria ghilianii* (Wuttke *et al.* 1994). In the present study, either this method or controlled current injection under voltage-clamp was used to depolarize the cell membrane. Both methods produced large  $\text{Ca}^{2+}$  transients that could be repeatedly elicited with little variation in peak amplitude (see Figs 1, 2). In all experiments, the depolarization was maintained beyond the rise time of the  $\text{Ca}^{2+}$  signal to ensure a maximal increase in  $[\text{Ca}^{2+}]_i$ .

Simultaneous measurements of  $[\text{Ca}^{2+}]_i$  and membrane potential showed that the depolarization induced by  $90 \text{ mmol l}^{-1}$   $[\text{K}^+]_o$  initiated action potentials that caused most of the  $\text{Ca}^{2+}$  transient. A typical example of such an experiment is illustrated in Fig. 1A. The increase in  $[\text{K}^+]_o$  depolarized the cell membrane from  $-60$  to  $-5 \text{ mV}$ , and four action potentials were elicited. The depolarization leading to the first action potential caused an initial rise in  $[\text{Ca}^{2+}]_i$ , followed by four discrete increases caused by the four action potentials (arrows in Fig. 1A).  $[\text{Ca}^{2+}]_i$  peaked shortly after the last action potential and then declined towards the resting level while the membrane was still depolarized. In similar experiments, an increase in

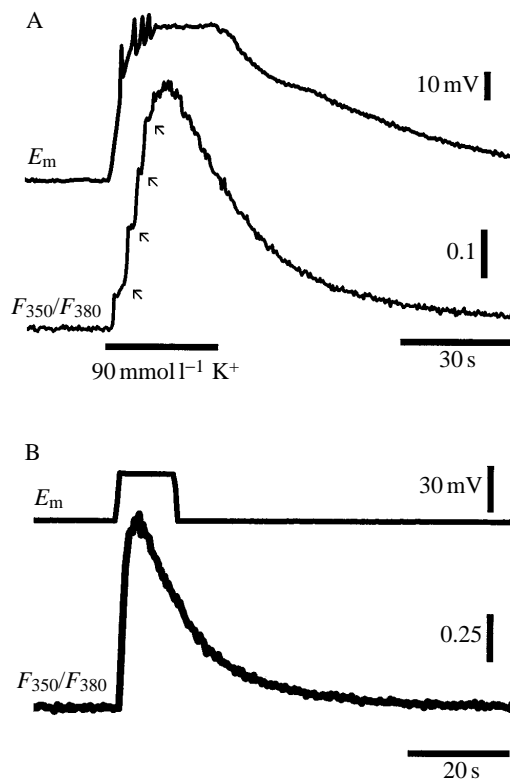

Fig. 1. Depolarization-induced transient elevations of  $[\text{Ca}^{2+}]_i$ . The membrane potential ( $E_m$ ) and the intracellular  $\text{Ca}^{2+}$  signal ( $F_{350}/F_{380}$ ) were simultaneously measured in two different cells. (A) A transient increase in  $[\text{K}^+]_o$  to  $90 \text{ mmol l}^{-1}$  produced a depolarization of the cell membrane from  $-60$  to  $-5$  mV and initiated four action potentials (clipped). The arrows (lower trace) point to the discrete elevations in  $[\text{Ca}^{2+}]_i$  associated with the four action potentials. (B) A depolarization step under voltage-clamp from  $-40$  to  $-10$  mV produced a large and monophasic increase in  $[\text{Ca}^{2+}]_i$ . As in A,  $[\text{Ca}^{2+}]_i$  began to decline towards the resting level during the maintained depolarization.

$[\text{K}^+]_o$  to  $90 \text{ mmol l}^{-1}$  depolarized the cell membrane to  $-9 \pm 3$  mV ( $N=9$ ) and initiated 2–6 action potentials. Each action potential was associated with a discrete elevation of  $[\text{Ca}^{2+}]_i$ , giving the overall increase a stepwise appearance.

In a different set of experiments, cells were voltage-clamped at a holding potential close to the resting membrane potential. Depolarizing voltage steps to  $-20$  or  $-10$  mV with a duration of 10–20 s resulted in monophasic elevations of  $[\text{Ca}^{2+}]_i$  with an amplitude similar to those elicited by  $90 \text{ mmol l}^{-1} [\text{K}^+]_o$  (Fig. 1B). Since the aim of using the voltage-clamp was to control membrane potential rather than to correlate  $\text{Ca}^{2+}$  inward current with  $\text{Ca}^{2+}$  transient amplitude, no attempts were made to block outward currents or to record clamp currents at a resolution that would allow a more detailed analysis.

#### *Ca<sup>2+</sup> transients are dependent on the influx of Ca<sup>2+</sup> through voltage-gated channels*

The  $\text{Ca}^{2+}$  transients are thought to result from activation of voltage-dependent  $\text{Ca}^{2+}$  channels allowing influx of  $\text{Ca}^{2+}$  from the external medium. To support this idea, cells were

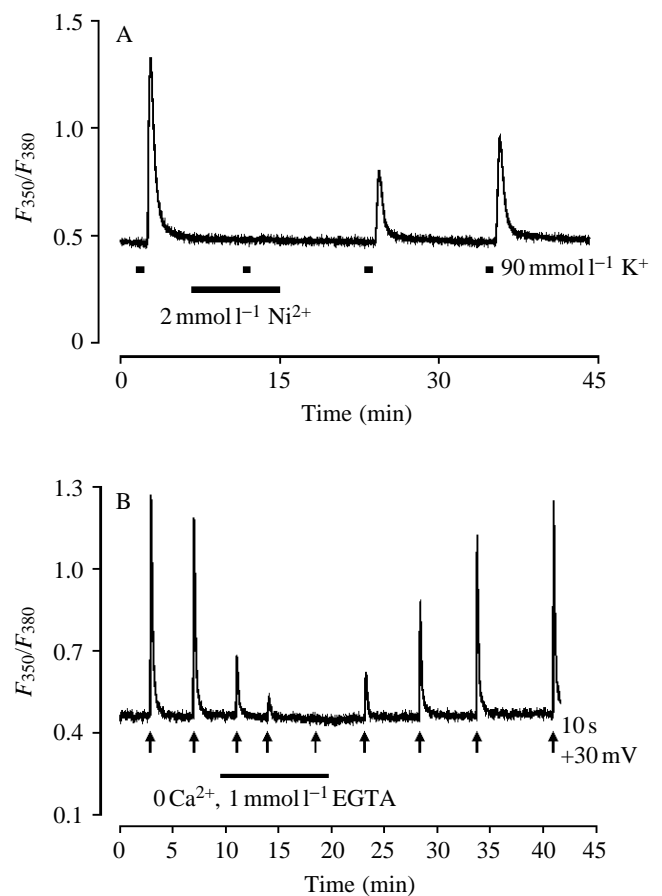

Fig. 2.  $\text{Ca}^{2+}$  transients are dependent on  $\text{Ca}^{2+}$  influx through voltage-gated  $\text{Ca}^{2+}$  channels. (A)  $\text{Ca}^{2+}$  transients, elicited by increasing  $[\text{K}^+]_o$  to  $90 \text{ mmol l}^{-1}$  for 30 s, were completely inhibited by  $2 \text{ mmol l}^{-1} \text{ Ni}^{2+}$ , an inorganic blocker of  $\text{Ca}^{2+}$  channels. The inhibition did not reverse readily after the removal of  $\text{Ni}^{2+}$  from the saline. (B)  $\text{Ca}^{2+}$  transients elicited by depolarizing steps ( $+30$  mV for 10 s, arrows) under voltage-clamp were reversibly abolished by removal of external  $\text{Ca}^{2+}$  ( $0 \text{ Ca}^{2+}$ ,  $1 \text{ mmol l}^{-1} \text{ EGTA}$ ). The holding potential was  $-40$  mV. The recordings shown in A and B are from different cells.

depolarized in the presence of  $\text{Ni}^{2+}$ , an inorganic  $\text{Ca}^{2+}$  antagonist that inhibits  $\text{Ca}^{2+}$  entry through  $\text{Ca}^{2+}$  channels, and in the absence of extracellular  $\text{Ca}^{2+}$ .

Many reports have shown that low concentrations ( $\text{IC}_{50}$ , approximately  $50 \mu\text{mol l}^{-1}$ ) of  $\text{Ni}^{2+}$  inhibit most LVA  $\text{Ca}^{2+}$  channels but have relatively little effect on almost all HVA  $\text{Ca}^{2+}$  channels (Fox *et al.* 1987; Bean, 1989; Zhang *et al.* 1993). Since the salivary cells of *Haementeria ghilianii* express both LVA and HVA  $\text{Ca}^{2+}$  channels (Wuttke and Berry, 1993), we used a relatively high concentration ( $2 \text{ mmol l}^{-1}$ ) of  $\text{Ni}^{2+}$  in order to block both  $\text{Ca}^{2+}$  conductances effectively. As shown in Fig. 2A, the  $\text{Ca}^{2+}$  transients were completely abolished by  $2 \text{ mmol l}^{-1} \text{ Ni}^{2+}$  ( $N=2$ ). They recovered only slowly and incompletely after removal of the  $\text{Ni}^{2+}$  from the saline.

$\text{Ca}^{2+}$  transients were similarly abolished by removal of  $\text{Ca}^{2+}$  from the saline that contained  $1 \text{ mmol l}^{-1} \text{ EGTA}$  (Fig. 2B,

$N=2$ ). The effects of  $\text{Ca}^{2+}$  removal were fully reversible. The results indicate that the  $\text{Ca}^{2+}$  transients depend entirely on  $\text{Ca}^{2+}$  influx from the external medium through voltage-activated channels.

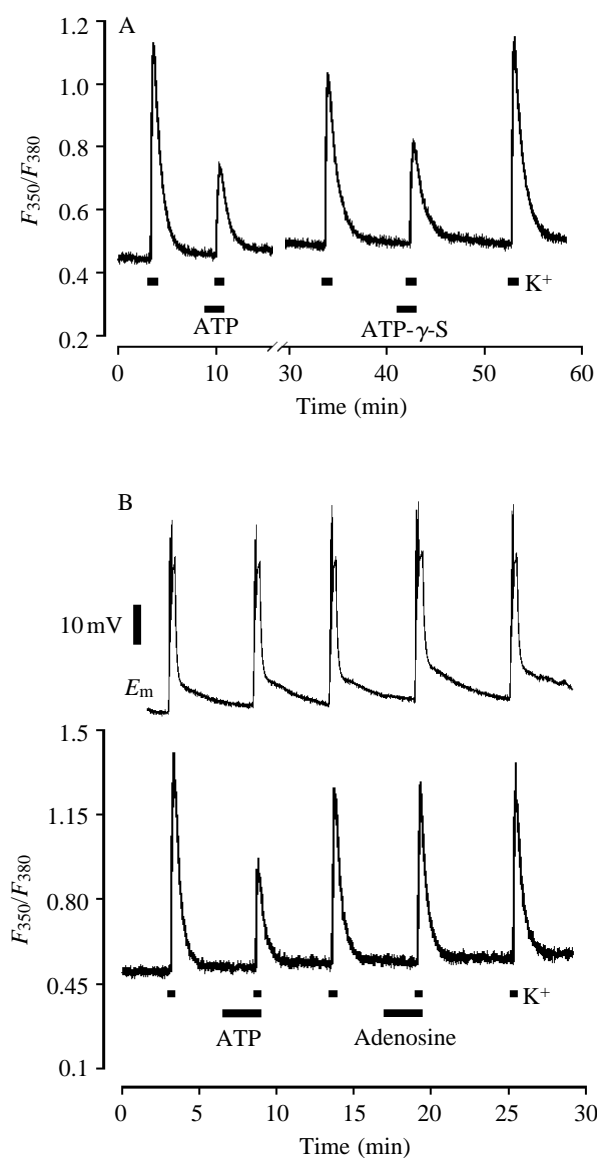

Fig. 3. Effects of ATP, ATP- $\gamma$ -S and adenosine on  $\text{Ca}^{2+}$  transients. (A) ATP ( $1 \mu\text{mol l}^{-1}$ ) and its hydrolysis-resistant analogue ATP- $\gamma$ -S ( $1 \mu\text{mol l}^{-1}$ ) attenuate  $\text{Ca}^{2+}$  transients evoked by membrane depolarizations in  $90 \text{ mmol l}^{-1} [\text{K}^+]_o$  to a similar extent. The gap represents a time of 13.5 min. (B) The membrane potential ( $E_m$ , upper trace) and  $[\text{Ca}^{2+}]_i$  (lower trace) were measured simultaneously. The first increase in  $[\text{K}^+]_o$  depolarized the cell membrane from  $-60$  to  $-5 \text{ mV}$  and elicited five action potentials (which are not clearly resolved in this figure). ATP ( $1 \mu\text{mol l}^{-1}$ ) reduced the number of action potentials to two without affecting the depolarization amplitude. The following control depolarization (in the absence of ATP) elicited four action potentials, and in the presence of adenosine ( $10 \mu\text{mol l}^{-1}$ ) this number increased to five. Adenosine had little effect on the  $\text{Ca}^{2+}$  transients and did not affect the membrane potential changes induced by  $90 \text{ mmol l}^{-1} [\text{K}^+]_o$ .

#### Effects of extracellular ATP on $\text{Ca}^{2+}$ transients, $[\text{Ca}^{2+}]_i$ and membrane potential

To test for its effects on  $\text{Ca}^{2+}$  transients, ATP ( $1 \mu\text{mol l}^{-1}$ ) or adenosine ( $10 \mu\text{mol l}^{-1}$ ) was added to the saline for 20–60 s before the membrane of a salivary cell was depolarized. ATP ( $1 \mu\text{mol l}^{-1}$ ) reduced the amplitude of  $\text{Ca}^{2+}$  transients on average to  $57 \pm 18\%$  ( $N=12$ ; Fig. 3); this effect was reversible within a few minutes after the ATP had been washed off the preparation. ATP- $\gamma$ -S, an analogue of ATP that is resistant to hydrolysis by ectonucleotidases, attenuated the  $\text{Ca}^{2+}$  transients to a similar extent as did ATP (Fig. 3A). Adenosine ( $10 \mu\text{mol l}^{-1}$ ), an agonist for  $\text{P}_1$ -type purinergic receptors, had little or no effect on the  $\text{Ca}^{2+}$  transients ( $-5 \pm 7\%$ ,  $N=4$ ; Fig. 3B). This suggests that ATP, but not one of its dephosphorylated analogues, inhibits  $\text{Ca}^{2+}$  influx.

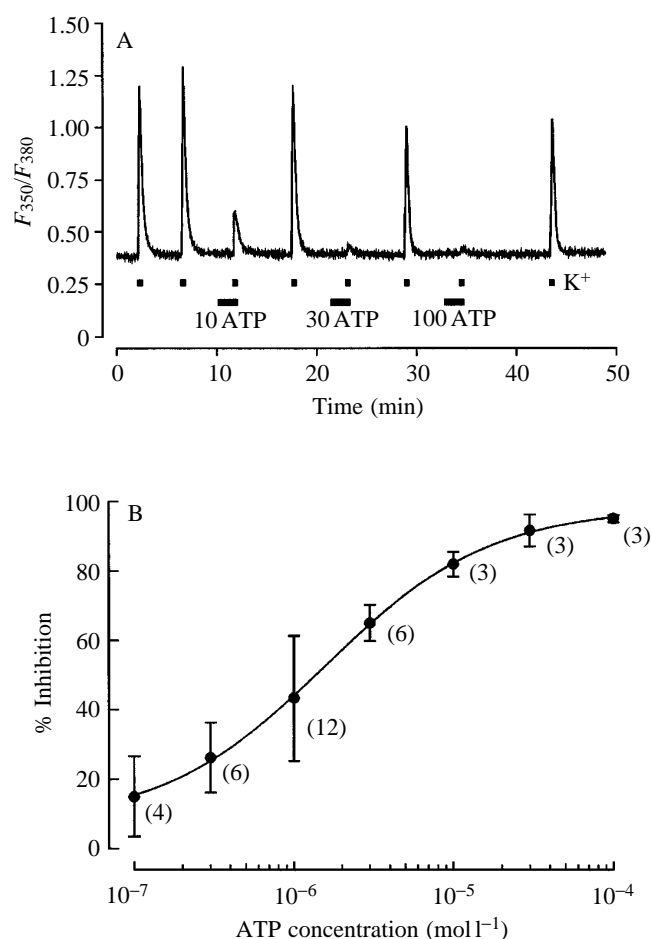

Fig. 4. The inhibition of  $\text{Ca}^{2+}$  influx by ATP is concentration-dependent. (A)  $\text{Ca}^{2+}$  transients, elicited by  $90 \text{ mmol l}^{-1} [\text{K}^+]_o$ , were greatly attenuated by  $10 \mu\text{mol l}^{-1}$  ATP and nearly completely inhibited by 30 and  $100 \mu\text{mol l}^{-1}$  ATP. The inhibitory effects of such high concentrations of ATP were not always completely reversible within the duration of the experiment. (B) Plot of  $\text{Ca}^{2+}$  transient inhibition (% of control) as a function of external ATP concentration. The points indicate mean values  $\pm$  S.D. ( $N$  is given in parentheses) and have been fitted with a non-linear regression routine with a Hill coefficient of 0.84 and an apparent  $\text{IC}_{50}$  of  $1.6 \mu\text{mol l}^{-1}$ .

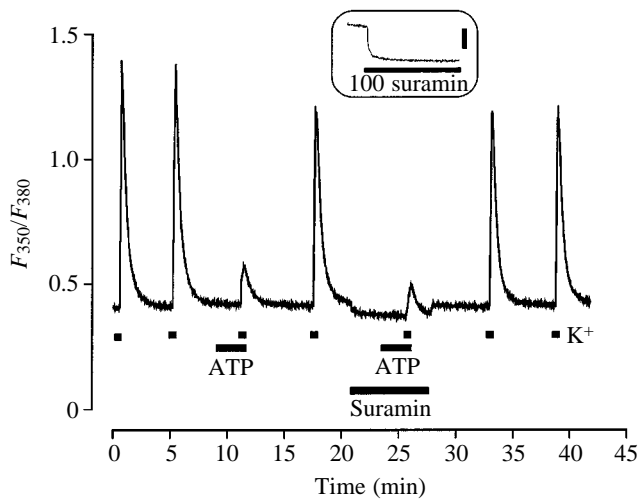

Fig. 5. Suramin does not block the inhibitory actions of ATP.  $Ca^{2+}$  transients were elicited by increases in  $[K^+]_o$  to  $90 \text{ mmol l}^{-1}$ . ATP ( $1 \text{ } \mu\text{mol l}^{-1}$ ) was applied 2 min and suramin ( $25 \text{ } \mu\text{mol l}^{-1}$ ) 4.5 min before the membrane was depolarized. Suramin caused an apparent decrease in  $[Ca^{2+}]_i$  that was due to a selective attenuation of the 350 nm fluorescence signal. The decrease of this signal induced by  $100 \text{ } \mu\text{mol l}^{-1}$  suramin is shown on an expanded scale in the inset, where the horizontal bar indicates the application of suramin (100 s) and the vertical bar represents  $5 \times 10^4 \text{ cts s}^{-1}$  fluorescence emission at 350 nm excitation.

ATP, like adenosine, did not influence the resting  $[Ca^{2+}]_i$ , the resting membrane potential or the membrane potential changes induced by  $90 \text{ mmol l}^{-1}$   $[K^+]_o$  (Fig. 3). Therefore, ATP appears to inhibit  $Ca^{2+}$  influx directly by modulating  $Ca^{2+}$  channels rather than by acting indirectly *via* changes in membrane potential or  $[Ca^{2+}]_i$ . This modulatory action of ATP is probably mediated by a purinoceptor that appears to be similar to the vertebrate  $P_2$  type in its insensitivity to adenosine.

ATP attenuated the  $Ca^{2+}$  transients in a dose-dependent manner. The threshold concentration was below  $0.1 \text{ } \mu\text{mol l}^{-1}$  (the lowest concentration tested) (Fig. 4), and the apparent  $IC_{50}$ , as determined from the dose-response curve (Fig. 4B), was  $1.6 \text{ } \mu\text{mol l}^{-1}$  ATP.  $Ca^{2+}$  transients were further reduced by higher ATP concentrations and almost completely inhibited by  $30 \text{ } \mu\text{mol l}^{-1}$  ( $6 \pm 1 \%$ ,  $N=3$ ) and  $100 \text{ } \mu\text{mol l}^{-1}$  ATP ( $5 \pm 1 \%$ ,  $N=3$ ) (Fig. 4). The generation of fully blown action potentials was completely suppressed in the presence of such high concentrations of ATP, although action potentials with a greatly reduced amplitude were sometimes observed. Lower concentrations of ATP reduced both the number of action potentials elicited and the influx of  $Ca^{2+}$  associated with an action potential. For example,  $1 \text{ } \mu\text{mol l}^{-1}$  ATP reduced the number of action potentials to  $51 \pm 23 \%$  ( $N=10$ ) and the increase in  $[Ca^{2+}]_i$  associated with the first action potential to  $56 \pm 18 \%$  ( $N=9$ ) of the control values.

#### Suramin does not block the effects of ATP

The trypanocidal compound suramin has been reported to

be a selective antagonist of vertebrate  $P_2$  receptors (vas deferens, Dunn and Blakeley, 1988; pheochromocytoma cells, Nakazawa *et al.* 1990; bladder and taenia coli, Hoyle *et al.* 1990; coeliac ganglion neurones, Evans *et al.* 1992; medial habenula neurones, Edwards *et al.* 1992; ventricular myocytes, Qu *et al.* 1993; megakaryocytes, Uneyama *et al.* 1994). To test for its effects on the salivary cells of *Haemeteria ghilianii*, suramin ( $25 \text{ } \mu\text{mol l}^{-1}$  or  $100 \text{ } \mu\text{mol l}^{-1}$ ) was added to the saline 2–3 min before the ATP ( $1 \text{ } \mu\text{mol l}^{-1}$ ). As illustrated in Fig. 5, suramin reduced the fluorescence ratio  $F_{350}/F_{380}$  by selectively attenuating the 350 nm fluorescence (see inset of Fig. 5). It did not, however, antagonize the inhibitory actions of ATP ( $N=3$ ).

## Discussion

### Validity of the fluorescence measurements

In this paper, we show that measurements of  $[Ca^{2+}]_i$  in the salivary cells of *Haemeteria ghilianii* can be performed over long periods (i.e.  $>2 \text{ h}$ ) using the  $Ca^{2+}$  indicator Fura-2. This fluorimetric technique may be hampered by photobleaching (Becker and Fay, 1987) or loss of dye from the cell (Mitsui *et al.* 1993), including diffusion of dye into cells electrically coupled to the cell under investigation (Munsch and Deitmer, 1995). In the majority of our experiments, the  $Ca^{2+}$ -independent fluorescence decreased after dye injection by about 50% before it stabilized. Diffusion of dye into neighbouring cells is unlikely to have contributed to the decrease. The salivary cells are not electrically coupled (Wuttke and Berry, 1988) and we did not observe a spread of fluorescence into neighbouring cells. It is also unlikely that continuous leakage of dye across the cell membrane or photobleaching of the dye are major factors causing the decrease, because both should have resulted in a rapid and nearly complete loss of fluorescence (Munsch and Deitmer, 1995). We think, therefore, that diffusion of the dye away from the point of injection into the large cell was the main cause for the observed changes in absolute fluorescence. Considering the enormous size of the salivary cells (up to  $1200 \text{ } \mu\text{m}$  in diameter), it is likely that local changes in dye concentration due to diffusion continue for some time after dye injection. This could either decrease or increase the fluorescence, depending on the relative positions of the field of view (which covers only part of the cell soma) and the insertion point of the dye-filled microelectrode. We observed an initial increase in fluorescence immediately after finishing the dye injection in some of our experiments.

We used the ratiometric approach for the  $Ca^{2+}$  imaging and found in all our experiments that  $[Ca^{2+}]_i$  was stable from the beginning of the fluorescence measurements (which began after dye injection) throughout the experiments. This is in agreement with the theory of the ratiometric fluorescence measurement, which predicts that the ratio of the  $Ca^{2+}$ -independent and  $Ca^{2+}$ -dependent fluorescence is sufficient to measure  $[Ca^{2+}]_i$  independently of variable factors such as the dye concentration (Grynkiewicz *et al.* 1985).

*Receptor type*

ATP attenuated the amplitude of  $\text{Ca}^{2+}$  transients in a rapid and concentration-dependent manner with a threshold concentration below  $0.1 \mu\text{mol l}^{-1}$ , while adenosine was without effect. This suggests the presence of a  $\text{P}_2$ -type purinoceptor in the salivary cells of *Haementeria ghilianii*.

The two major classes of  $\text{P}_2$  purinoceptors,  $\text{P}_{2X}$  and  $\text{P}_{2Y}$ , may be distinguished on the basis of the relative potencies of ATP analogues and differing functional responses (Burnstock, 1990). The  $\text{P}_{2X}$  receptors belong to the superfamily of transmitter-gated ion channels, whereas the  $\text{P}_{2Y}$  receptors are thought to be metabotropic and members of the G-protein-coupled receptor superfamily. We did not test for potency orders of ATP analogues to distinguish between  $\text{P}_{2X}$  and  $\text{P}_{2Y}$ . However, our experiments provide no evidence for the coupling of the purinoceptor to a ligand-gated ion channel. These channels are usually permeable to  $\text{Na}^+$ ,  $\text{K}^+$  and  $\text{Ca}^{2+}$ , and their opening has a depolarizing, excitatory effect (Bean, 1992). ATP, however, did not affect the resting membrane potential of salivary cells (Fig. 3) nor did it produce a change in membrane resistance or, if the membrane potential was controlled by voltage-clamp, in holding current (Wuttke and Berry, 1993).

The purinoceptor thus seems to resemble the vertebrate  $\text{P}_{2Y}$  type (for a recent description and newly proposed subclassification, see Barnard *et al.* 1994). Because UTP has a similar potency compared with ATP (Everill and Berry, 1995), the purinoceptor may at present best be compared with the  $\text{P}_{2U}$  type (O'Connor *et al.* 1991), although the presence of two independent receptors for UTP and ATP has not been excluded.

Besides certain similarities, there are also important differences in the properties of vertebrate  $\text{P}_{2Y}$  receptors and the purinoceptor of the salivary cells. For example, activation of vertebrate  $\text{P}_{2Y}$  receptors usually results in the release of  $\text{Ca}^{2+}$  from intracellular stores (Barnard *et al.* 1994). In the salivary cells, however, even high concentrations of ATP failed to increase  $[\text{Ca}^{2+}]_i$  (Fig. 4A). The receptors are also different in their sensitivity to suramin, which has been shown to block  $\text{P}_2$  receptors in many different vertebrate preparations. In the salivary cells, however, suramin did not antagonize the inhibitory actions of ATP on the  $\text{Ca}^{2+}$  transients (Fig. 5; Everill and Berry, 1995). The receptor shares this insensitivity with other invertebrate  $\text{P}_2$ -type purinoceptors, expressed by neurones in the central nervous system of the medicinal leech (Backus *et al.* 1994).

*ATP inhibition of  $\text{Ca}^{2+}$  transients*

The depolarization-induced  $\text{Ca}^{2+}$  transients depend primarily on the influx of  $\text{Ca}^{2+}$  through voltage-gated  $\text{Ca}^{2+}$  channels (Fig. 2). This influx is consistently and rapidly inhibited by ATP. At low ATP concentrations and with  $90 \text{ mmol l}^{-1} \text{ K}^+$  as the depolarizing agent, this reduction is due to a decrease in both the number of action potentials elicited and the  $\text{Ca}^{2+}$  influx associated with each action potential. Higher concentrations of ATP ( $30\text{--}100 \mu\text{mol l}^{-1}$ ) block the

generation of action potentials and almost completely inhibit the  $\text{Ca}^{2+}$  transients without altering the resting  $[\text{Ca}^{2+}]_i$ , the resting membrane potential or the depolarization amplitude. This rules out the involvement of a  $\text{Ca}^{2+}$ -induced inactivation of  $\text{Ca}^{2+}$  current (e.g. Xiong *et al.* 1991) and suggests that the  $\text{Ca}^{2+}$  influx is inhibited by a direct modulation of voltage-gated  $\text{Ca}^{2+}$  channels. A previous voltage-clamp study supports the view that an HVA  $\text{Ca}^{2+}$  conductance is selectively modulated by ATP, reducing the  $\text{Ca}^{2+}$  current amplitude and increasing its rate of inactivation in these salivary cells (Wuttke and Berry, 1993).

A similar inhibition by ATP of a  $\text{Ca}^{2+}$  conductance has been found in some vertebrate preparations. In bovine chromaffin cells, ATP slows the activation kinetics of an HVA  $\text{Ca}^{2+}$  current (Gandía *et al.* 1993), whereas in ferret ventricular myocytes, it inhibits an L-type  $\text{Ca}^{2+}$  current by altering its inactivation kinetics and by slowing the recovery from inactivation (Qu *et al.* 1993). In both preparations, the inhibitory actions of ATP are likely to be mediated by  $\text{P}_2$ -type purinergic receptors that appear to have a similar affinity for ATP ( $\text{IC}_{50}$   $1 \mu\text{mol l}^{-1}$  and  $0.56 \mu\text{mol l}^{-1}$ , respectively) compared with that of the purinoceptor on the leech salivary cells ( $\text{IC}_{50}$   $1.6 \mu\text{mol l}^{-1}$ ). Experimental evidence suggests that the two vertebrate receptors are coupled to G-proteins. No such evidence is yet available for the purinoceptor of *Haementeria ghilianii*.

$\text{P}_2$  receptors are not usually coupled to adenylyl cyclase (Burnstock, 1990). Recent evidence, however, suggests that activation of certain  $\text{P}_{2U}$  receptors not only activates phospholipase C, but also changes the concentration of cyclic nucleotides. For example, a reduction in the cyclic AMP concentration has been reported for hamster smooth muscle (Sipma *et al.* 1994) and rat glioma cells (Boyer *et al.* 1993), whereas in mouse neuroblastoma  $\times$  rat glioma hybrid cells the cyclic GMP synthesis is activated (Reiser, 1995). In the salivary cells, changes in intracellular cyclic AMP concentration are unlikely to be involved in the inhibition of  $\text{Ca}^{2+}$  transients because cyclic AMP has no apparent effect on  $\text{Ca}^{2+}$  currents. Injection of cyclic GMP into a salivary cell, however, increases action potential duration by enhancing the inward  $\text{Ca}^{2+}$  current (Everill and Berry, 1995). Whether ATP, which has an opposite effect on  $\text{Ca}^{2+}$  currents, acts by reducing the intracellular cyclic GMP concentration remains to be investigated.

This study was supported by the Deutsche Forschungsgemeinschaft (De 231/9-2).

**References**

- BACKUS, K. H., BRAUM, S., LOHNER, F. AND DEITMER, J. W. (1994). Neuronal responses to purinoceptor agonists in the leech central nervous system. *J. Neurobiol.* **25**, 1283–1292.
- BARNARD, E. A., BURNSTOCK, G. AND WEBB, T. E. (1994). G-protein coupled receptors for ATP and other nucleotides: a new receptor family. *Trends pharmac. Sci.* **15**, 67–70.

- BEAN, B. P. (1989). Classes of calcium channels in vertebrate cells. *A. Rev. Physiol.* **51**, 367–384.
- BEAN, B. P. (1992). Pharmacology and electrophysiology of ATP-activated ion channels. *Trends pharmac. Sci.* **13**, 87–90.
- BECKER, P. L. AND FAY, F. S. (1987). Photobleaching of fura-2 and its effect on determination of calcium concentrations. *Am. J. Physiol.* **253**, C613–C618.
- BOYER, J. L., LAZAROWSKI, E. R., CHEN, X. H. AND HARDEN, T. K. (1993). Identification of a P<sub>2Y</sub>-purinergic receptor that inhibits adenylyl cyclase. *J. Pharmac. exp. Ther.* **267**, 1140–1146.
- BURNSTOCK, G. (1990). Purinergic mechanisms. *Ann. N.Y. Acad. Sci.* **603**, 1–17.
- DUBYAK, G. R. (1991). Signal transduction by P<sub>2</sub>-purinoceptors for extracellular ATP. *Am. J. resp. molec. Biol.* **4**, 295–300.
- DUNN, P. M. AND BLAKELEY, A. G. H. (1988). Suramin: a reversible P<sub>2</sub>-purinoceptor antagonist in the mouse vas deferens. *Br. J. Pharmac.* **93**, 243–245.
- EDWARDS, F. A., GIBB, A. J. AND COLQUHOUN, D. (1992). ATP-mediated synaptic currents in the central nervous system. *Nature* **357**, 144–147.
- EVANS, R. J., DERKACH, V. AND SURPRENANT, A. (1992). ATP mediates fast synaptic transmission in mammalian neurons. *Nature* **357**, 503–505.
- EVERILL, B. AND BERRY, M. S. (1995). Differential modulation of voltage-activated conductances by intracellular and extracellular cyclic nucleotides in leech salivary glands. *Br. J. Pharmac.* **116**, 1849–1858.
- FOX, A. P., NOWYCKY, M. C. AND TSIEN, R. W. (1987). Kinetic and pharmacological properties distinguishing three types of calcium currents in chick sensory neurones. *J. Physiol., Lond.* **394**, 149–172.
- GANDÍA, L., GARCÍA, A. G. AND MORAD, M. (1993). ATP modulation of calcium channels in chromaffin cells. *J. Physiol., Lond.* **470**, 55–72.
- GORDON, J. L. (1986). Extracellular ATP: effects, sources and fate. *Biochem. J.* **233**, 309–319.
- GRYNKIEWICZ, G., POENIE, M. AND TSIEN, R. Y. (1985). A new generation of Ca<sup>2+</sup> indicators with greatly improved fluorescence properties. *J. biol. Chem.* **260**, 3440–3450.
- HOYLE, C. H. V., KNIGHT, G. E. AND BURNSTOCK, G. (1990). Suramin antagonizes responses to P<sub>2</sub>-purinoceptor agonist and purinergic nerve stimulation in the guinea-pig urinary bladder and taenia coli. *Br. J. Pharmac.* **99**, 617–621.
- MARSHALL, C. G. AND LENT, C. M. (1984). Calcium-dependent action potentials in leech giant salivary cells. *J. exp. Biol.* **113**, 367–380.
- MITSUI, M., ABE, A., TAJIMI, M. AND KARAKI, H. (1993). Leakage of the fluorescent Ca<sup>2+</sup> indicator Fura-2 in smooth muscle. *Jap. J. Pharmac.* **61**, 165–170.
- MUNSCH, T. AND DEITMER, J. W. (1995). Maintenance of Fura-2 fluorescence in glial cells and neurones of the leech central nervous system. *J. Neurosci. Meth.* **57**, 195–204.
- NAKAZAWA, K., FUJIMORI, K., TAKANAKA, A. AND INOUE, K. (1990). Reversible and selective antagonism by suramin of ATP-activated inward current in PC12 pheochromocytoma cells. *Br. J. Pharmac.* **101**, 224–226.
- O'CONNOR, S. E., DAINTY, I. A. AND LEFF, P. (1991). Further subclassification of ATP receptors based on agonist studies. *Trends pharmac. Sci.* **12**, 137–141.
- QU, Y., CAMPBELL, D. L. AND STRAUSS, H. C. (1993). Modulation of L-type Ca<sup>2+</sup> current by extracellular ATP in ferret isolated right ventricular myocytes. *J. Physiol., Lond.* **471**, 295–317.
- REISER, G. (1995). Ca<sup>2+</sup>- and nitric oxide-dependent stimulation of cyclic GMP synthesis in neuronal cell line induced by P<sub>2</sub>-purinergic/pyrimidinergic receptor. *J. Neurochem.* **64**, 61–68.
- SAWYER, R. T., DAMAS, D. AND TOMIC, M. T. (1982). Anatomy and histochemistry of the salivary complex of the giant leech *Haementeria ghilianii* (Hirudinea: Rhynchobdellida). *Arch. Zool. exp. gén.* **122**, 411–425.
- SIPMA, H., DEN-HERTOG, A. AND NELEMANS, A. (1994). The phospholipase C activating P<sub>2U</sub> purinoceptor also inhibits cyclic AMP formation in DDTI MF-2 smooth muscle cells. *Eur. J. Pharmac.* **268**, 431–437.
- UNEYAMA, H., UNEYAMA, C., EBIHARA, S. AND AKAIKE, N. (1994). Suramin and reactive blue 2 are antagonists for a newly identified purinoceptor on rat megacaryocyte. *Br. J. Pharmac.* **111**, 245–249.
- WALZ, B., SCHÄFFNER, K.-H. AND SAWYER, R. T. (1988). Ultrastructure of the anterior salivary gland cells of the giant leech, *Haementeria ghilianii* (Annelida, Hirudinea). *J. Morph.* **196**, 321–332.
- WUTTKE, W. A. AND BERRY, M. S. (1988). Calcium-dependent action potentials in giant salivary gland cells of the leech *Haementeria ghilianii*. *J. exp. Biol.* **138**, 431–453.
- WUTTKE, W. A. AND BERRY, M. S. (1993). Extracellular ATP selectively modulates a high-voltage-activated calcium conductance in salivary gland cells of the leech *Haementeria ghilianii*. *J. exp. Biol.* **181**, 313–319.
- WUTTKE, W. A., MUNSCH, T. AND BERRY, M. S. (1994). Intracellular pH of giant salivary cells of the leech *Haementeria ghilianii*: regulation and effects on secretion. *J. exp. Biol.* **189**, 179–198.
- XIONG, Z., KITAMURA, K. AND KURIYAMA, H. (1991). ATP activates cationic currents and modulates the calcium current through GTP-binding protein in rabbit portal vein. *J. Physiol., Lond.* **440**, 143–165.
- ZHANG, J.-F., RANDALL, A. D., ELLINOR, P. T., HORNE, W. A., SATHER, W. A., TANABE, T., SCHWARZ, T. L. AND TSIEN, R. W. (1993). Distinctive pharmacology and kinetics of cloned neuronal Ca<sup>2+</sup> channels and their possible counterparts in mammalian CNS neurons. *Neuropharmac.* **32**, 1075–1088.
